# Supplementary material for: Design of bio-based organic phase change materials containing a “safety valve”
Source: Royal Society of Chemistry journal article supplement (doi:10.1039/d1gc02618f), 2021-01-01
Supplement: d1gc02618f1.pdf [file d1gc02618f1.pdf]

## *Supplementary Information for*

### **Design of Bio-based Organic Phase Change Materials Containing “Safety Valve”**

Yishun Wuliu <sup>a, b</sup>, Jingkai Liu <sup>b, c #</sup>, Liyue Zhang <sup>b, d</sup>, Shuaipeng Wang <sup>b</sup>, Yuejun Liu <sup>a</sup>,  
Jianxiang Feng <sup>a \*</sup>, Xiaoqing Liu <sup>b, c \*</sup>

<sup>a</sup> College of Packaging and Materials Engineering, Hunan University of Technology,  
Zhuzhou 412007 (China)

<sup>b</sup> Ningbo Institute of Materials Technology and Engineering, Chinese Academy of  
Sciences, Ningbo, Zhejiang 315201 (China)

<sup>c</sup> University of Chinese Academy of Sciences, Beijing 100049 (China)

<sup>d</sup> New Material Institute, University of Nottingham Ningbo China, Ningbo, Zhejiang  
315100 (China)

#Equal contribution to the first author

\*Author for the Correspondence: E-mail: liuxq@nimte.ac.cn (Xiaoqing Liu);  
14157@hut.edu.cn (Jianxiang Feng)

## AE of the Benzoxazine Syntheses.

### 1. C-fa-4

$$\text{AE (\%)} = [\text{MM}_{\text{C-fa-4}} / [\text{MM}_{\text{Cardanol}} + \text{MM}_{\text{Butylamine}} + 3(\text{MM}_{\text{pf}})] \times 100 \% = 401.68 \text{ g}\cdot\text{mol}^{-1} \\ / [304.52 \text{ g}\cdot\text{mol}^{-1} + 73.14 \text{ g}\cdot\text{mol}^{-1}] + 3(30 \text{ g}\cdot\text{mol}^{-1})] \times 100 \% = 85.8 \%$$

### 2. C-fa-8

$$\text{AE (\%)} = [\text{MM}_{\text{C-fa-8}} / [\text{MM}_{\text{Cardanol}} + \text{MM}_{\text{Octylamine}} + 3(\text{MM}_{\text{pf}})] \times 100 \% = 457.79 \text{ g}\cdot\text{mol}^{-1} \\ / [304.52 \text{ g}\cdot\text{mol}^{-1} + 129.25 \text{ g}\cdot\text{mol}^{-1}] + 3(30 \text{ g}\cdot\text{mol}^{-1})] \times 100 \% = 87.4 \%$$

### 3. C-fa-12

$$\text{AE (\%)} = [\text{MM}_{\text{C-fa-12}} / [\text{MM}_{\text{Cardanol}} + \text{MM}_{\text{Dodecylamine}} + 3(\text{MM}_{\text{pf}})] \times 100 \% = 513.90 \text{ g}\cdot\text{mol}^{-1} \\ / [304.52 \text{ g}\cdot\text{mol}^{-1} + 185.36 \text{ g}\cdot\text{mol}^{-1}] + 3(30 \text{ g}\cdot\text{mol}^{-1})] \times 100 \% = 88.6 \%$$

### 4. C-aa-4

$$\text{AE (\%)} = [\text{MM}_{\text{C-aa-4}} / [\text{MM}_{\text{Cardanol}} + \text{MM}_{\gamma\text{-aminobutyric acid}} + 3(\text{MM}_{\text{pf}})] \times 100 \% = 431.66 \\ \text{ g}\cdot\text{mol}^{-1} / [304.52 \text{ g}\cdot\text{mol}^{-1} + 103.12 \text{ g}\cdot\text{mol}^{-1}] + 3(30 \text{ g}\cdot\text{mol}^{-1})] \times 100 \% = 86.7 \%$$

### 5. C-aa-8

$$\text{AE (\%)} = [\text{MM}_{\text{C-aa-8}} / [\text{MM}_{\text{Cardanol}} + \text{MM}_{8\text{-aminooctanoic acid}} + 3(\text{MM}_{\text{pf}})] \times 100 \% = 431.66 \\ \text{ g}\cdot\text{mol}^{-1} / [304.52 \text{ g}\cdot\text{mol}^{-1} + 159.23 \text{ g}\cdot\text{mol}^{-1}] + 3(30 \text{ g}\cdot\text{mol}^{-1})] \times 100 \% = 88.1 \%$$

### 6. C-aa-12

$$\text{AE (\%)} = [\text{MM}_{\text{C-aa-12}} / [\text{MM}_{\text{Cardanol}} + \text{MM}_{12\text{-aminolauric acid}} + 3(\text{MM}_{\text{pf}})] \times 100 \% = 487.77 \\ \text{ g}\cdot\text{mol}^{-1} / [304.52 \text{ g}\cdot\text{mol}^{-1} + 215.34 \text{ g}\cdot\text{mol}^{-1}] + 3(30 \text{ g}\cdot\text{mol}^{-1})] \times 100 \% = 89.2 \%$$

### 7. C-ae-4

$$\text{AE (\%)} = [\text{MM}_{\text{C-ae-4}} / [\text{MM}_{\text{Cardanol}} + \text{MM}_{4\text{-aminobutyric acid methyl ester}} + 3(\text{MM}_{\text{pf}})] \times 100 \% = \\ 487.77 \text{ g}\cdot\text{mol}^{-1} / [304.52 \text{ g}\cdot\text{mol}^{-1} + 117.15 \text{ g}\cdot\text{mol}^{-1}] + 3(30 \text{ g}\cdot\text{mol}^{-1})] \times 100 \% = 87.1 \%$$

8. C-ae-8

$$\text{AE (\%)} = \frac{[\text{MM}_{\text{C-ae-8}}]}{[\text{MM}_{\text{Cardanol}} + \text{MM}_{8\text{-Aame}} + 3(\text{MM}_{\text{pf}})]} \times 100 \% = 487.77 \text{ g}\cdot\text{mol}^{-1} \\ \frac{1}{[304.52 \text{ g}\cdot\text{mol}^{-1} + 173.26 \text{ g}\cdot\text{mol}^{-1}] + 3(30 \text{ g}\cdot\text{mol}^{-1})} \times 100 \% = 88.3 \%$$

9. C-ae-12

$$\text{AE (\%)} = \frac{[\text{MM}_{\text{C-ae-12}}]}{[\text{MM}_{\text{Cardanol}} + \text{MM}_{12\text{-Aame}} + 3(\text{MM}_{\text{pf}})]} \times 100 \% = 487.77 \text{ g}\cdot\text{mol}^{-1} \\ \frac{1}{[304.52 \text{ g}\cdot\text{mol}^{-1} + 229.36 \text{ g}\cdot\text{mol}^{-1}] + 3(30 \text{ g}\cdot\text{mol}^{-1})} \times 100 \% = 89.4 \%$$

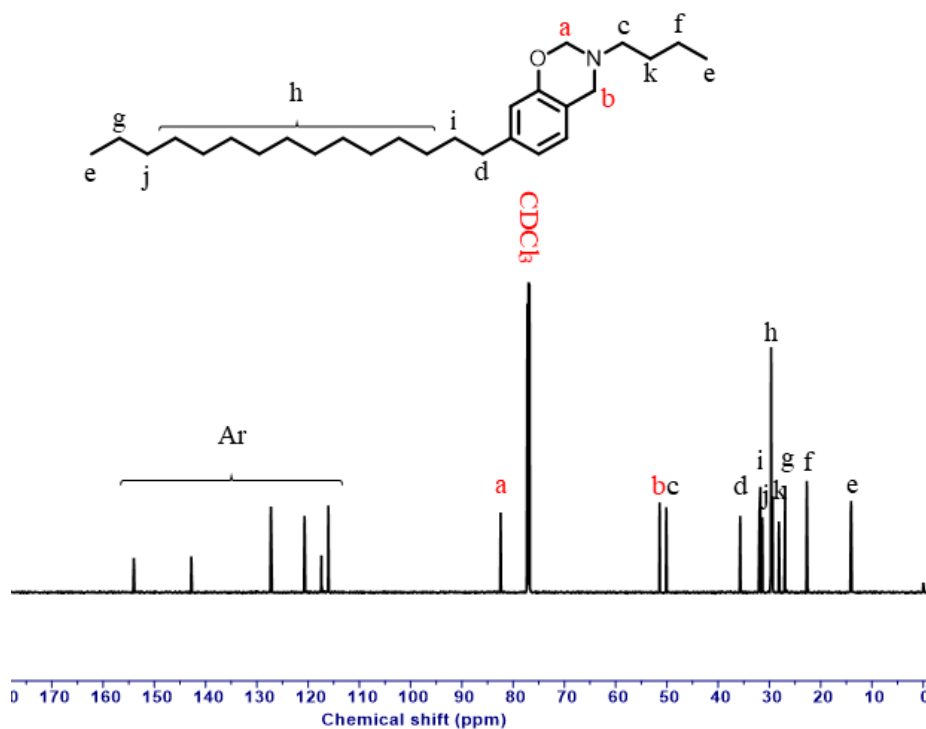

Figure S1. <sup>13</sup>C NMR spectra of C-fa-4.

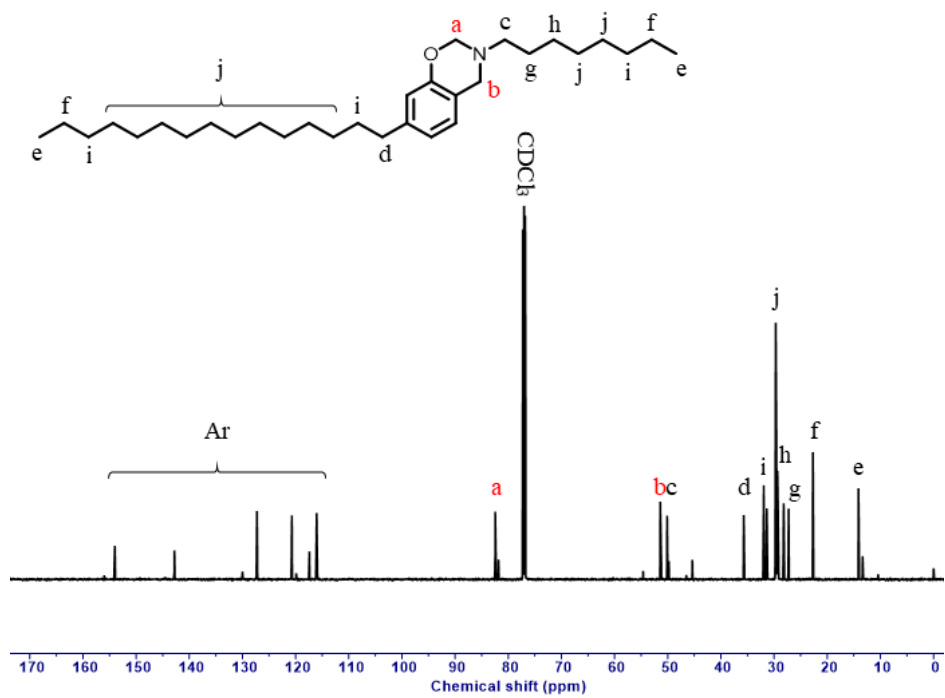

**Figure S2.**  $^{13}\text{C}$  NMR spectra of C-fa-8.

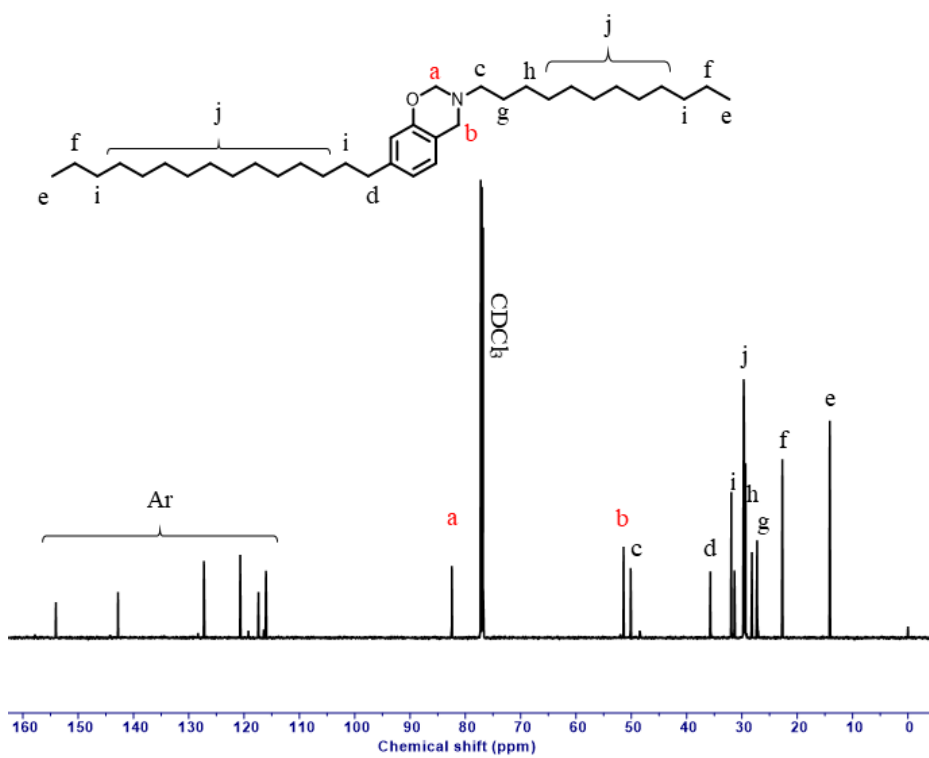

**Figure S3.**  $^{13}\text{C}$  NMR spectra of C-fa-12.

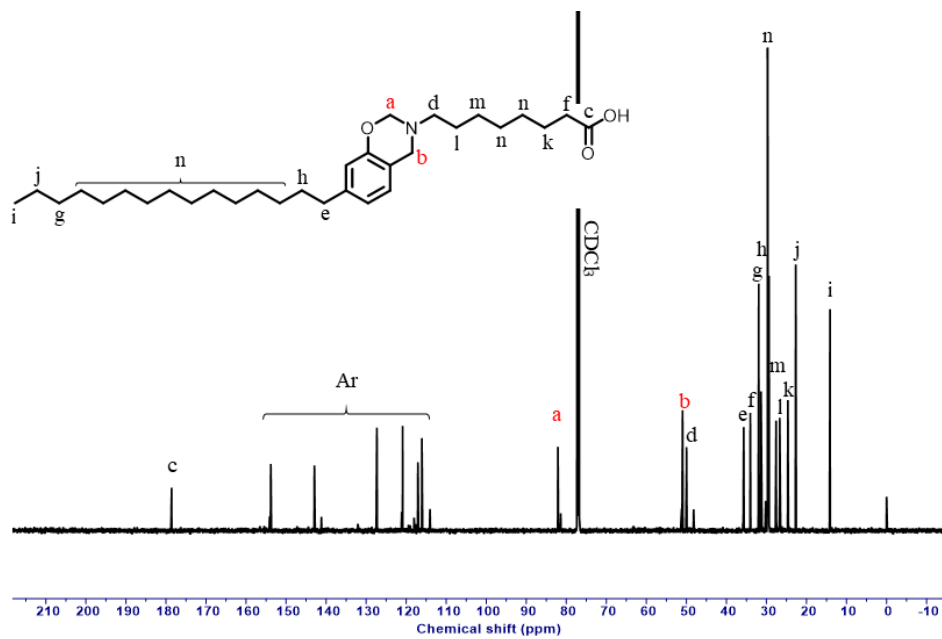

**Figure S4.**  $^{13}\text{C}$  NMR spectra of C-aa-4.

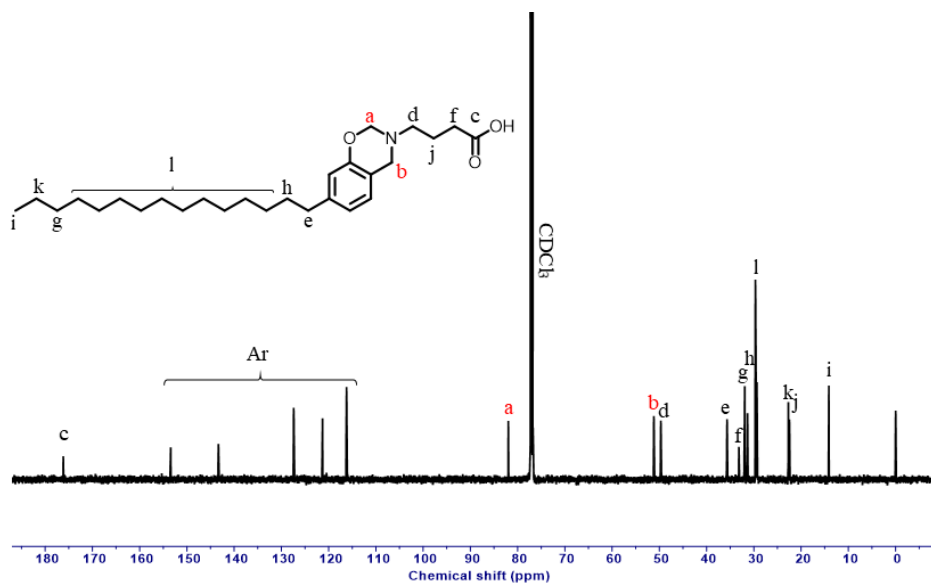

**Figure S5.**  $^{13}\text{C}$  NMR spectra of C-aa-8.

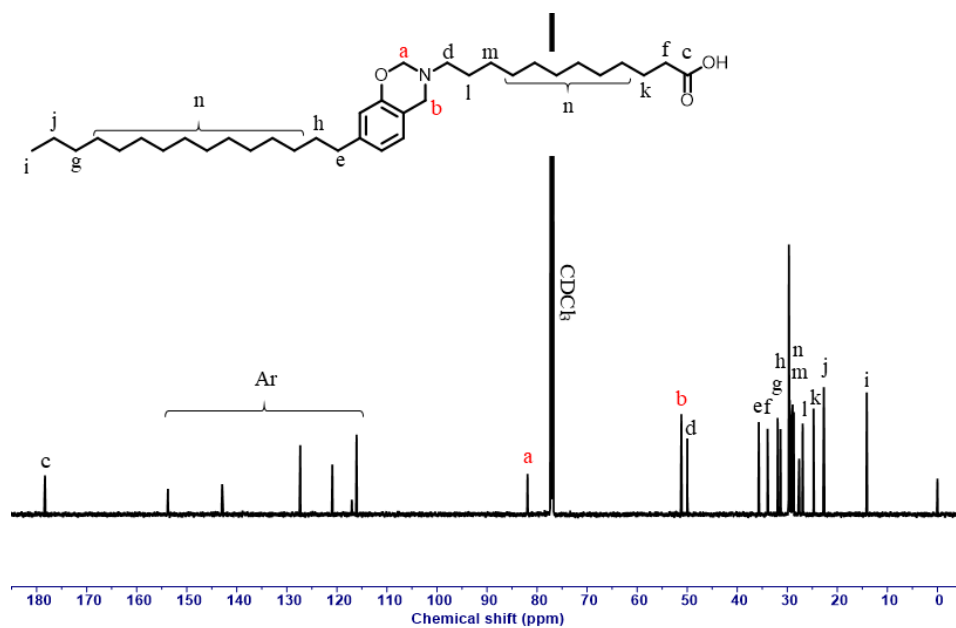

**Figure S6.**  $^{13}\text{C}$  NMR spectra of C-aa-12.

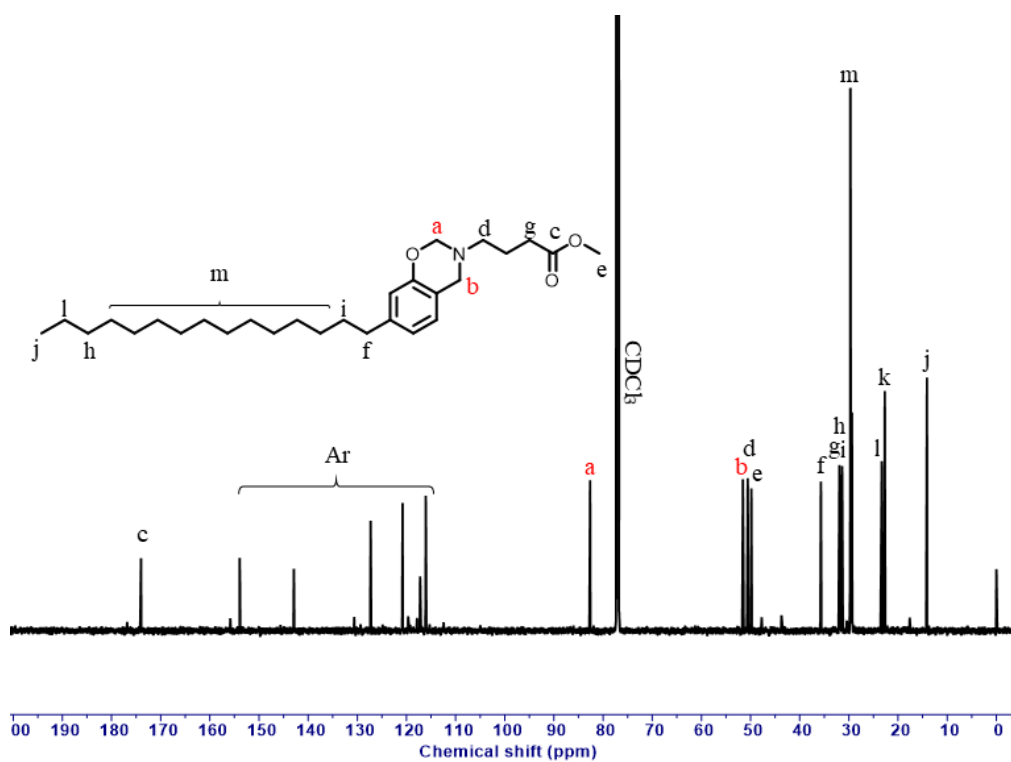

**Figure S7.**  $^{13}\text{C}$  NMR spectra of C-ae-4.

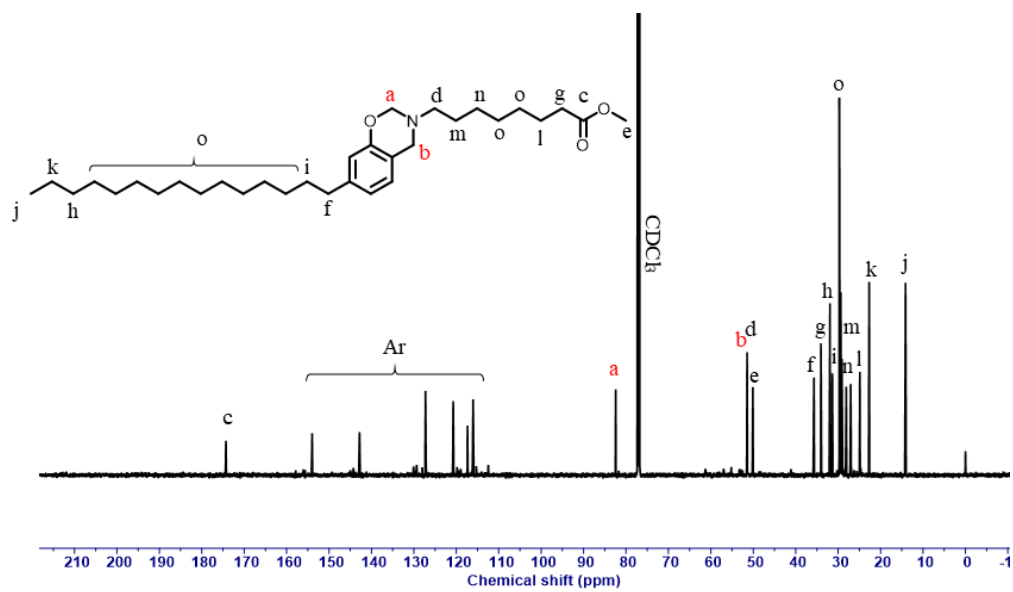

**Figure S8.**  $^{13}\text{C}$  NMR spectra of C-ae-8.

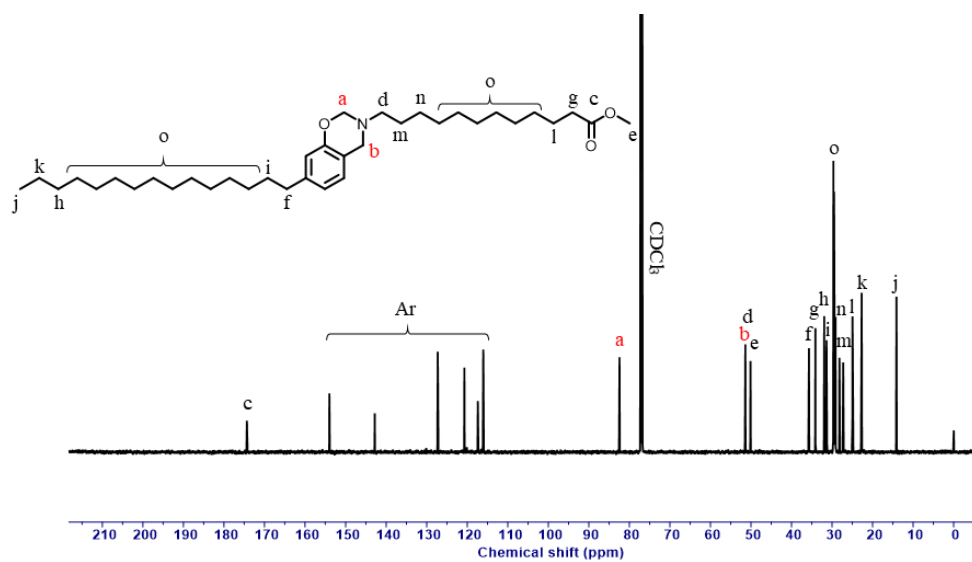

**Figure S9.**  $^{13}\text{C}$  NMR spectra of C-ae-12.

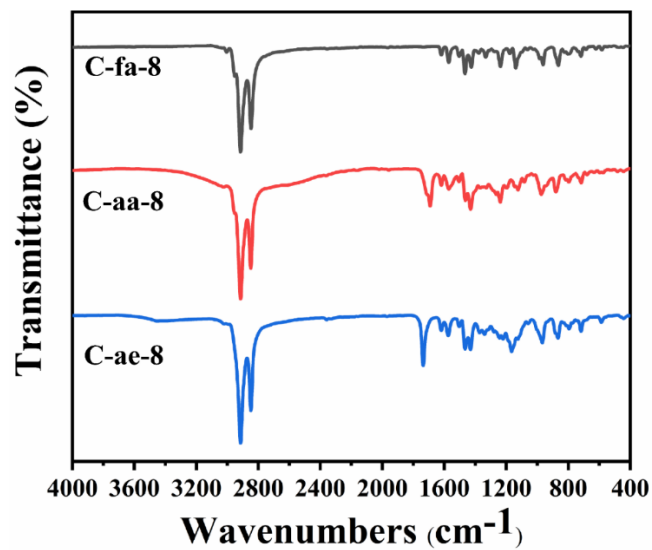

Figure S10. FT-IR curves of C-fa-8, C-aa-8, C-ae-8.

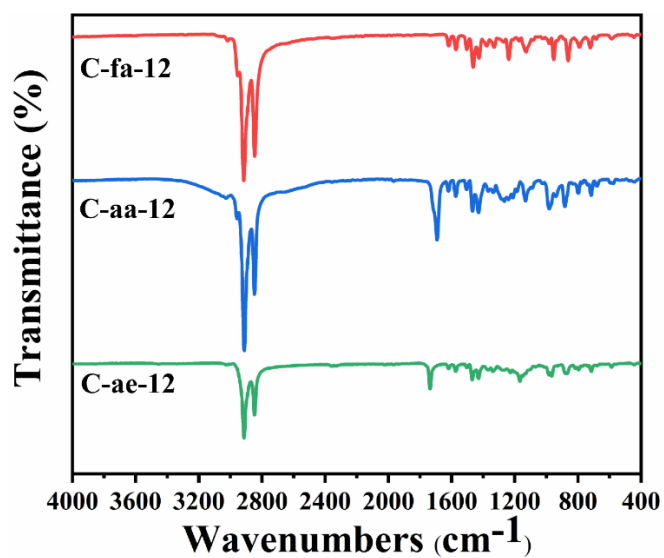

Figure S11. FT-IR results of C-fa-12, C-aa-12, C-ae-12.



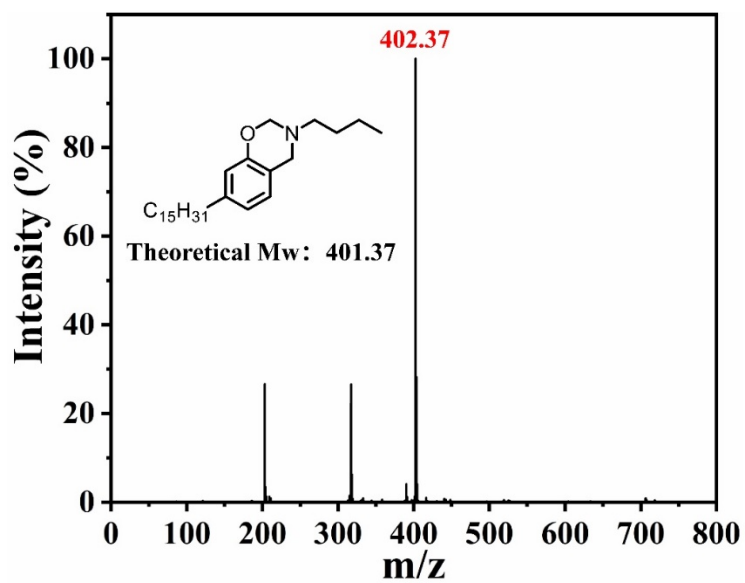

Figure S12. HRMS spectra of C-fa-4.

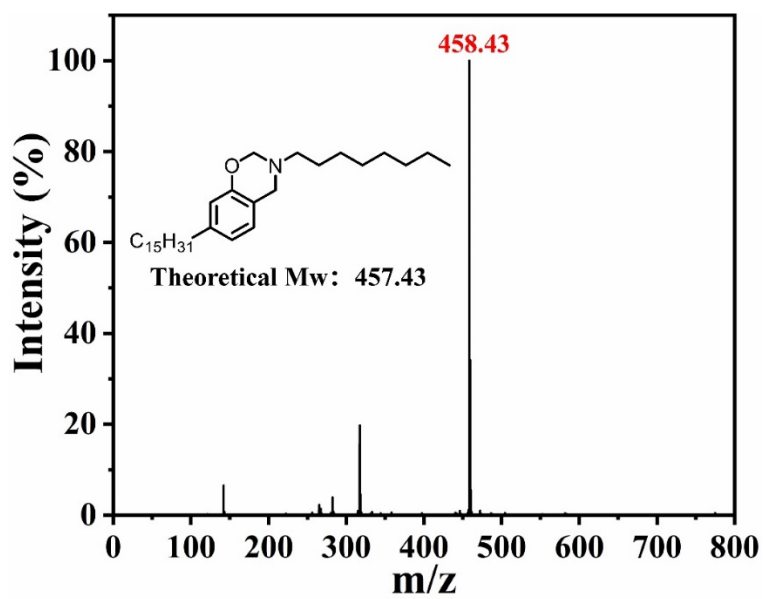

Figure S13. HRMS results of C-fa-8.

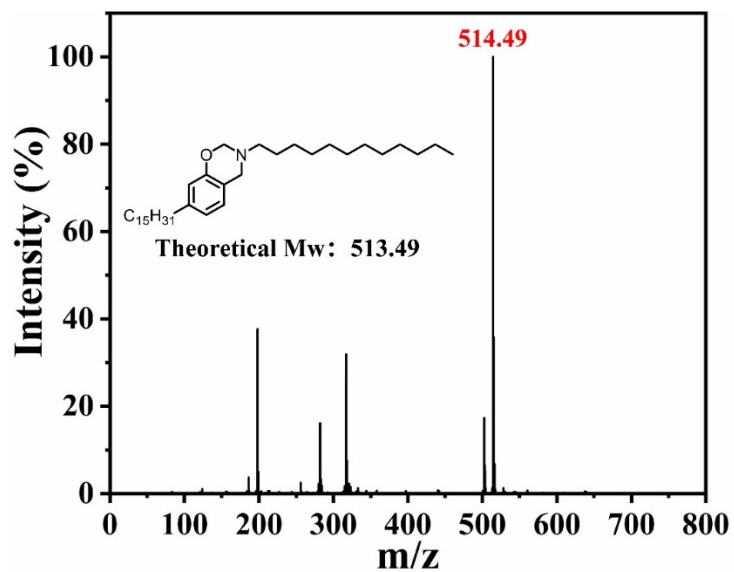

Figure S14. HRMS spectra of C-fa-12.

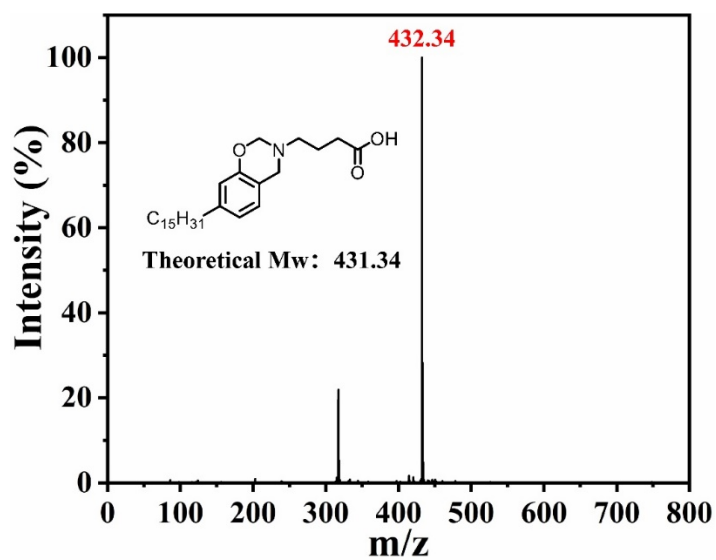

Figure S15. HRMS results of C-aa-4.

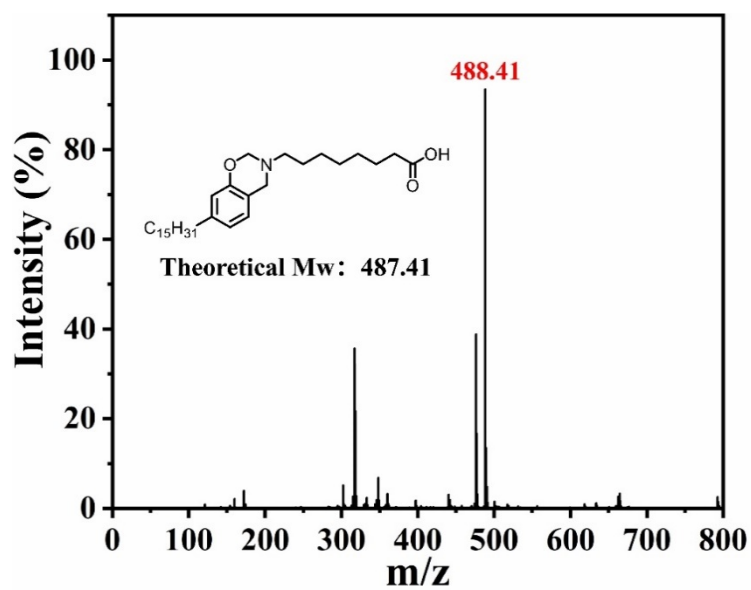

Figure S16. HRMS spectra of C-aa-8.

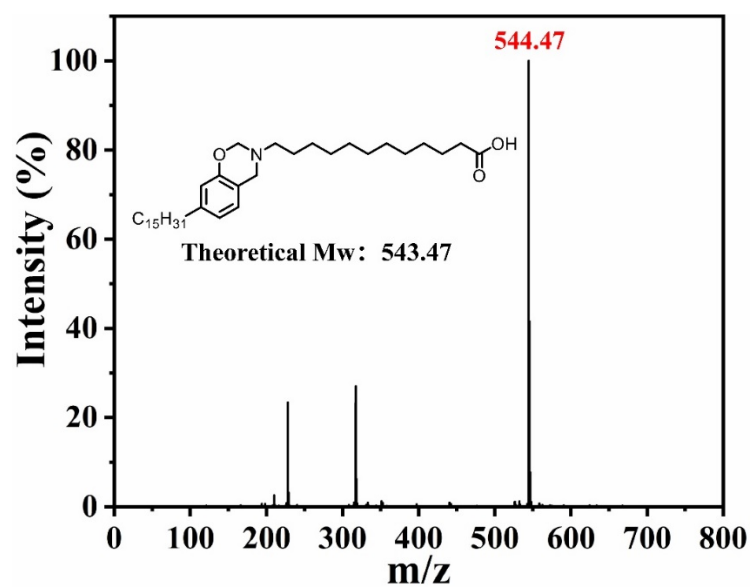

Figure S17. HRMS results of C-aa-12.

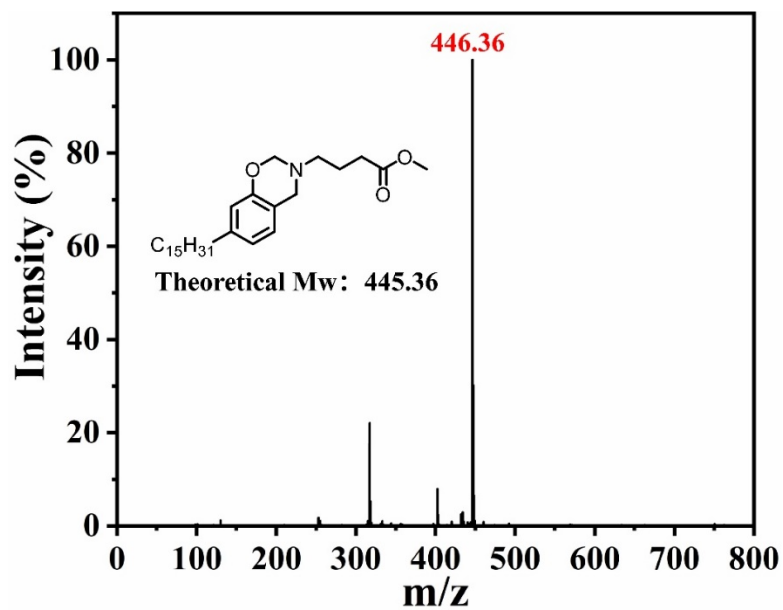

Figure S18. HRMS spectra of C-ae-4.

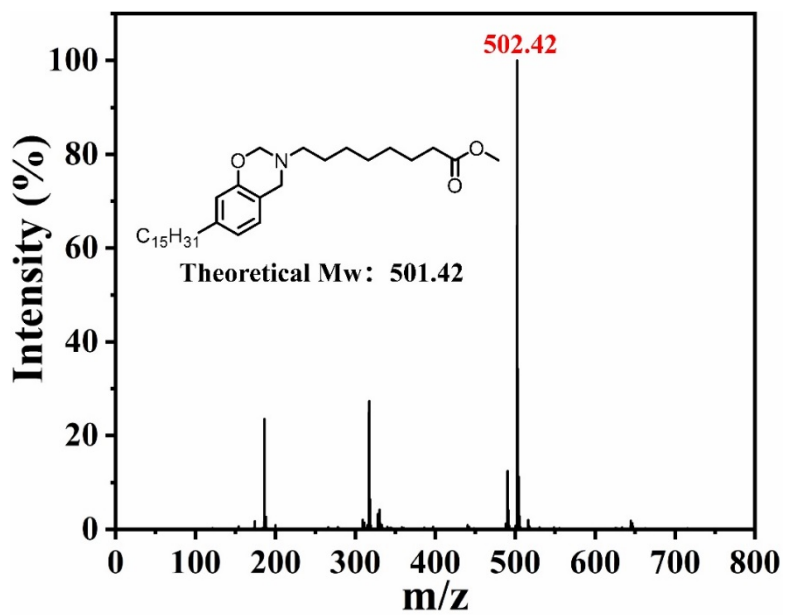

Figure S19. HRMS results of C-ae-8.

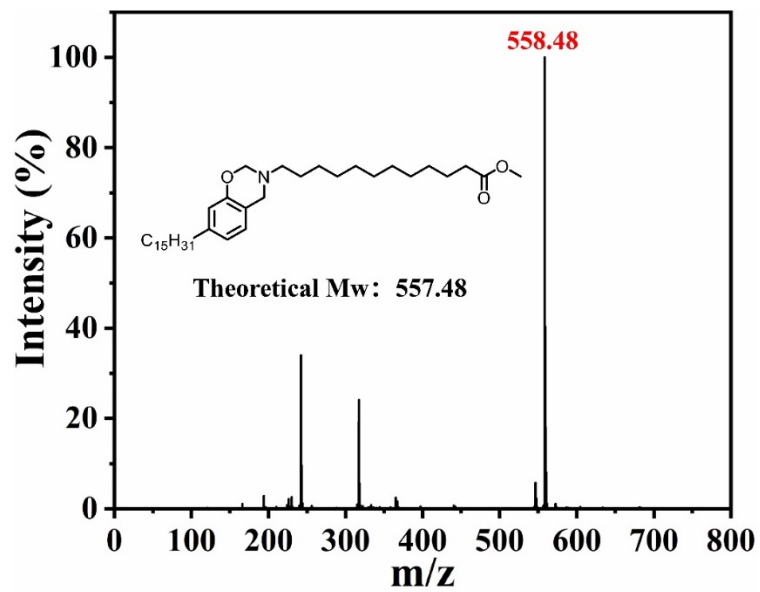

Figure S20. HRMS spectra of C-ae-12.

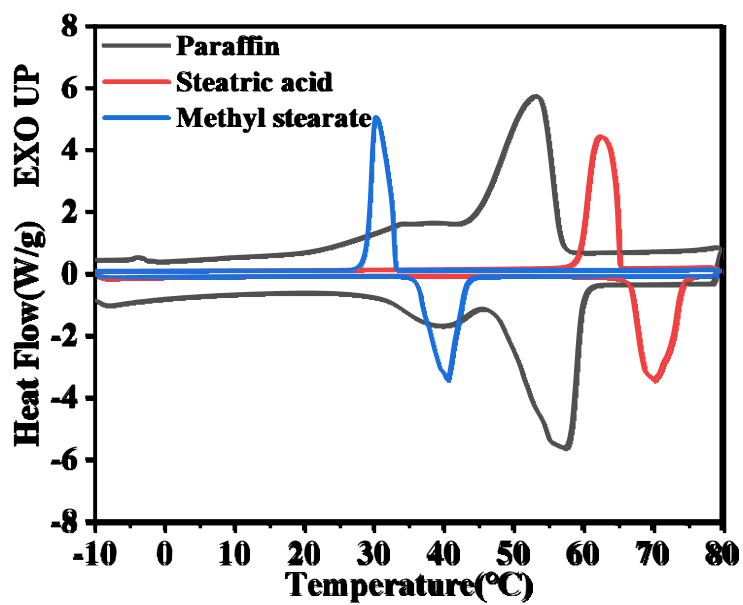

Figure S21. DSC curves of commercial PCM (paraffin, stearic acid, methyl stearate).

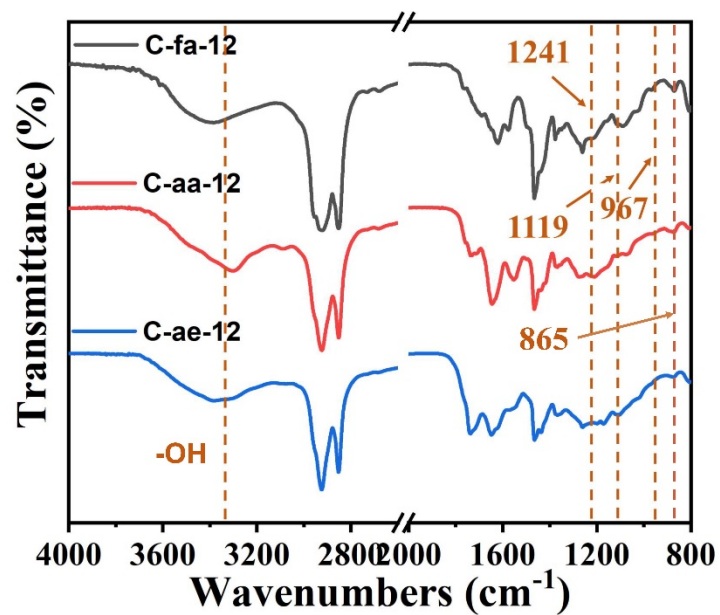

Figure S22. FT-IR spectra of cured C-fa-12, C-aa-12 and C-ae-12.

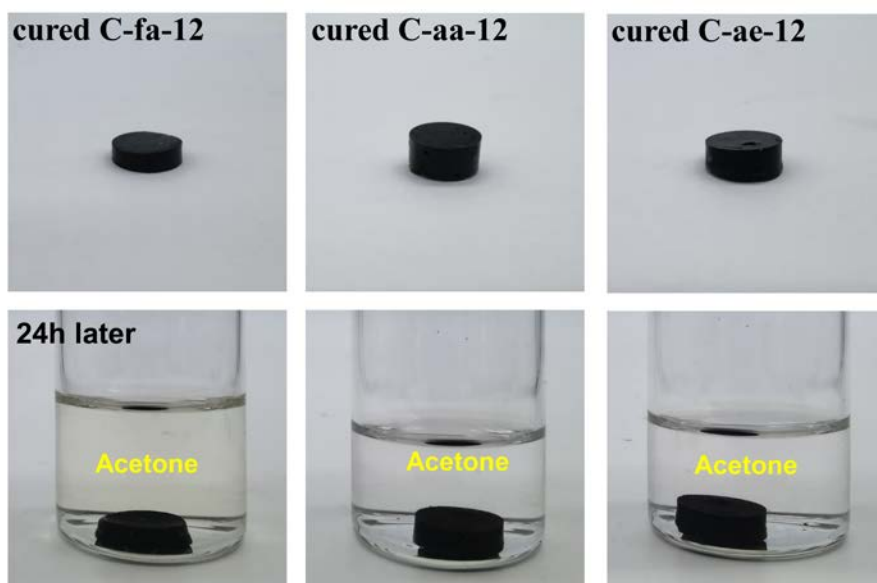

Figure S23. Digital photos of cured samples before and after acetone immersion.

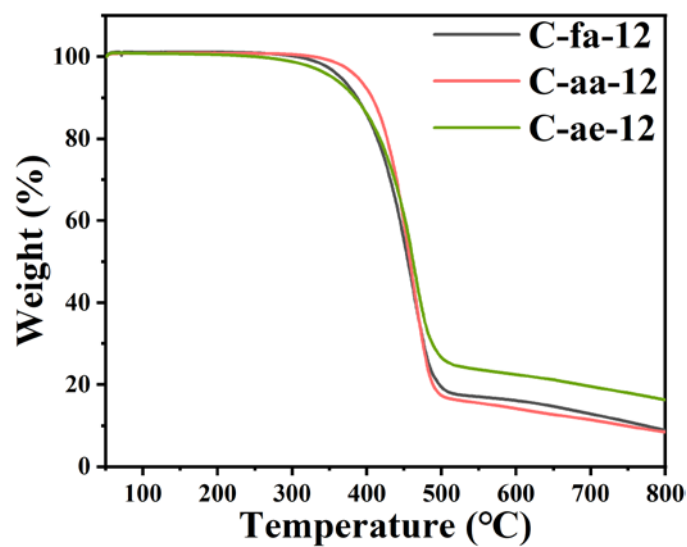

**Figure S24.** TGA curves of cured C-fa-12, C-aa-12 and C-ae-12.

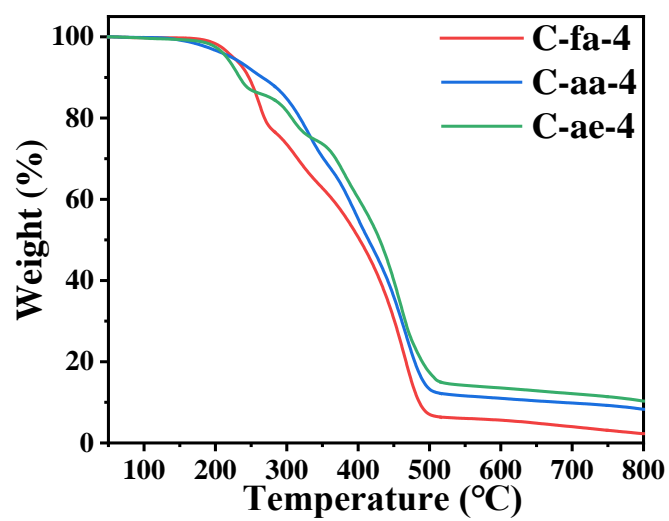

**Figure S25.** TGA curves of different groups of the same carbon chain (4C).

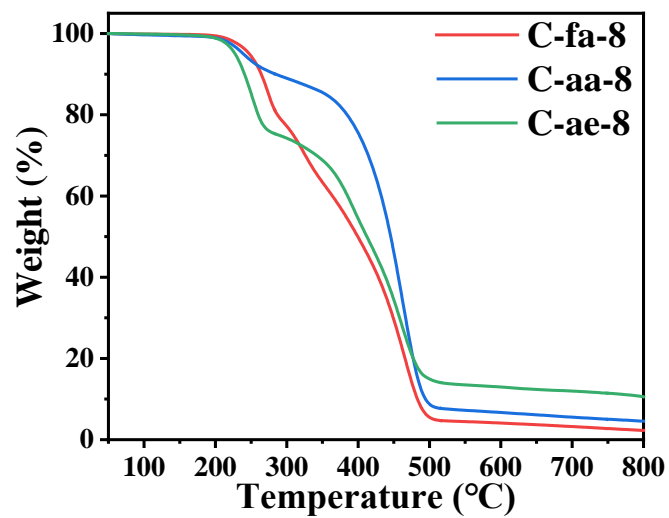

**Figure S26.** TGA curves of different groups of the same carbon chain (8C).

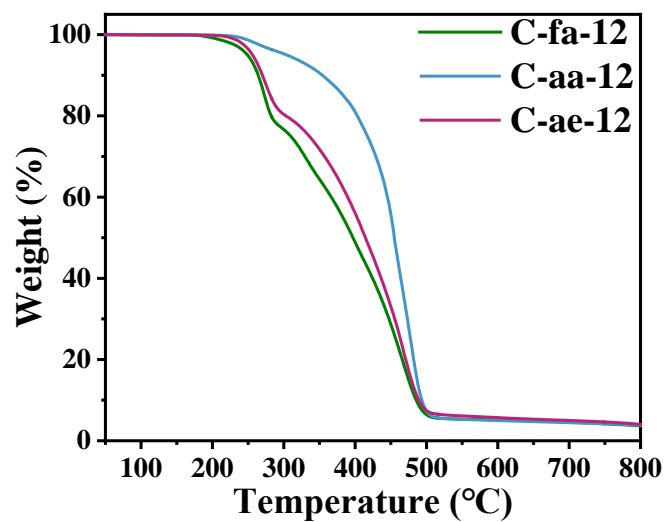

**Figure S27.** TGA curves of different groups of the same carbon chain (12C).



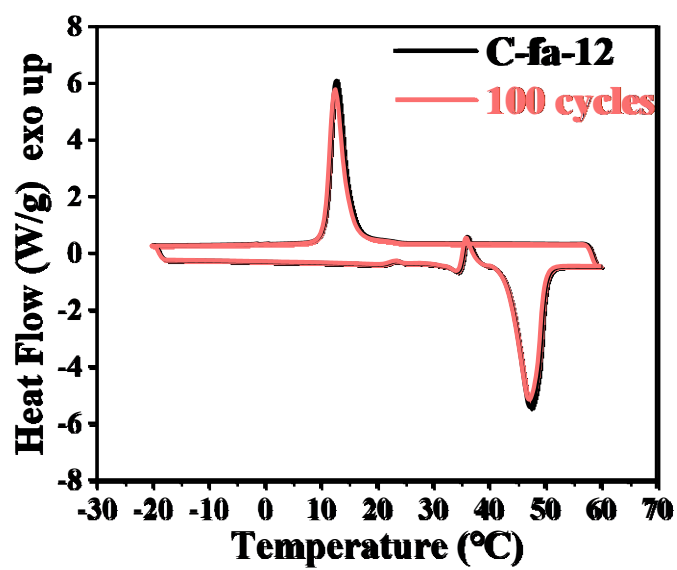

Figure S28. DSC curves of C-fa-12 before and after cycle-used 100 times.

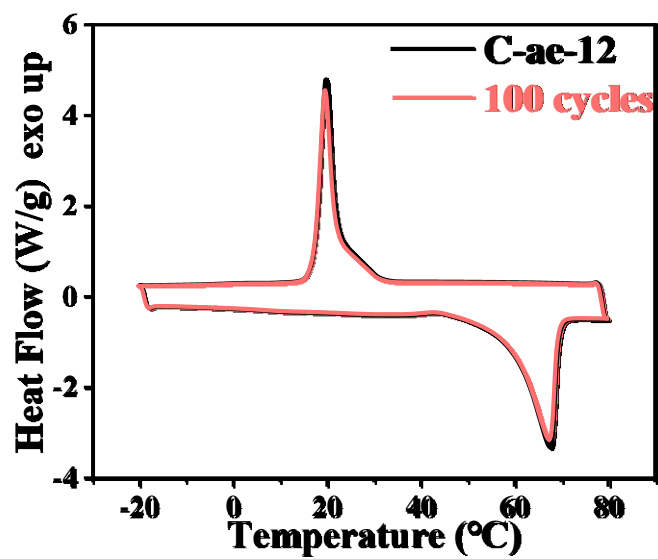

Figure S29. DSC curves of C-ae-12 before and after cycle-used 100 times.

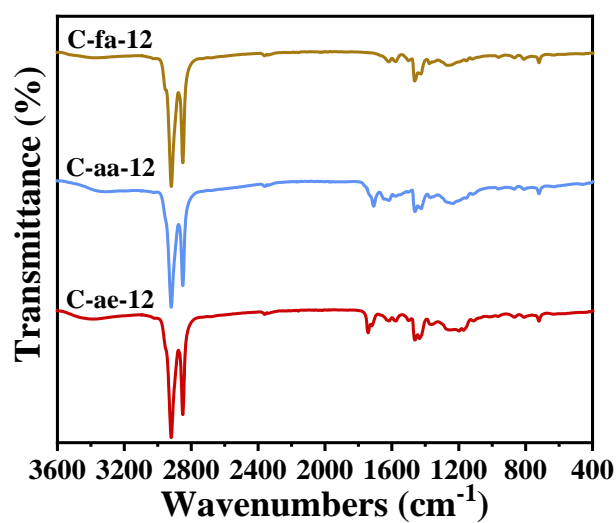

**Figure S30.** FT-IR spectra of the as-synthesized after ignition test.

**Table S1** Samples curing temperature and evaporation before curing.

| Samples | Curing temperature (°C) | Evaporation before curing (%) |
|---------|-------------------------|-------------------------------|
| C-fa-4  | 252                     | 11                            |
| C-fa-8  | 257                     | 9                             |
| C-fa-12 | 265                     | 8                             |
| C-aa-4  | 173                     | 2                             |
| C-aa-8  | 194                     | 1                             |
| C-aa-12 | 224                     | 1                             |
| C-ae-4  | 209                     | 4                             |
| C-aa-8  | 219                     | 3                             |
| C-aa-12 | 250                     | 4                             |
